# Supplementary material for: Adverse Effects of Oral Nonselective and cyclooxygenase-2-Selective NSAIDs on Hospitalization for Acute Kidney Injury: A Nested Case–Control Cohort Study
Source: PubMed Central journal article supplement (PMC4782836; doi:10.1097/md.0000000000002645), 2016-03-07
Supplement: medi-95-e2645-s001.pdf [file medi-95-e2645-s001.pdf]

**Supplementary Table 1. Characteristics and Database Codes**

| <b>Characteristics</b>      | <b>Database ICD-9 code</b>          |
|-----------------------------|-------------------------------------|
| Hypertension                | 401.x – 405.x                       |
| Diabetes mellitus           | 250.x                               |
| Chronic liver disease       | 571.2,571.4,571.5,571.6,572.2-572.8 |
| Heart failure               | 428.x                               |
| Coronary artery disease     | 411.x, 413.x, 414.x                 |
| Dyslipidemia                | 272.0, 272.1, 272.2, 272.4          |
| Autoimmune disease          | 370.33, 710.x, 714.0, 720, 720.0    |
| Drug abuse                  | 304.x – 305.x                       |
| Peripheral vascular disease | 443.9,441.x,785.4,V43.4             |
| Cerebrovascular disease     | 430.x – 438.x                       |
| Gout                        | 274.9                               |
| Nephrolithiasis             | 592.x                               |
| Cancer                      | 140.x – 208.x                       |

**Supplementary Table 2. Crude and Adjusted Odds Ratios for the Risk of Hospitalization for Acute Kidney Injury With Different Type of NSAIDs in Patients Without Heart Failure**

|                               | <b>Odds Ratio (95% CI)</b> |                |                  |                |
|-------------------------------|----------------------------|----------------|------------------|----------------|
|                               | <b>Crude</b>               | <b>P Value</b> | <b>Adjusted*</b> | <b>P Value</b> |
| <b>No non-selective NSAID</b> | 1 [Reference]              |                | 1 [Reference]    |                |

| use †                           |                  |        |                  |        |
|---------------------------------|------------------|--------|------------------|--------|
| <b>Non-selective NSAID use</b>  |                  |        |                  |        |
| <b>Current</b> §                | 5.06 (4.52-5.66) | <0.001 | 2.94 (2.42-3.57) | <0.001 |
| <b>Recent</b> †                 | 1.98 (1.80-2.17) | <0.001 | 1.25 (1.07-1.47) | 0.005  |
| <b>Past</b> ¶                   | 1.00 (0.93-1.09) | 0.925  | 0.61 (0.53-0.69) | <0.001 |
| <b>No COX-2 inhibitor use</b> † | 1 [Reference]    |        | 1 [Reference]    |        |
| <b>COX-2 inhibitor use</b>      |                  |        |                  |        |
| <b>Current</b> §                | 2.14 (1.66-2.74) | <0.001 | 0.94 (0.60-1.47) | 0.794  |
| <b>Recent</b> †                 | 1.83 (1.36-2.47) | <0.001 | 0.93 (0.52-1.68) | 0.820  |
| <b>Past</b> ¶                   | 1.44 (1.24-1.69) | <0.001 | 0.71 (0.53-0.95) | 0.023  |

*Abbreviations:* NSAID, non-steroidal anti-inflammatory drugs; CI, confidence interval; COX, cyclooxygenase.

\* Adjusted for all confounder in Table 1.

† During the year prior to the index date.

‡ A prescription termination date (date of dispensation plus the day supply) overlapping with the index date.

§ A prescription termination date of 1 to 30 days before the index date.

¶ A prescription termination date of 31 to 180 days before the index date.
